# Supplementary material for: A simple explanation of the enhancement or depletion of the enantiomeric excess in the partial sublimation of enantiomerically enriched amino acids
Source: Royal Society of Chemistry journal article supplement (doi:10.1039/b915610k), 2010-01-01
Supplement: b915610k.pdf [file b915610k.pdf]

## **A Simple Explanation of the Enhancement or Depletion of the Enantiomeric Excess in Fractional Sublimation of Enantiomerically Enriched Amino Acids.**

Aurélien Bellec and Jean-Claude Guillemin\*

École Nationale Supérieure de Chimie de Rennes, CNRS, UMR 6226, Avenue du Général Leclerc, CS 50837, 35708 Rennes Cedex 7, France and Université européenne de Bretagne.

### **Electronic Supplementary Information (ESI) (3 pages)**

To determine the reproducibility of the sublimations, five similar experiments were performed starting from (DL + L) samples with a starting *ee* of 9%. The *ee* of the sublimates range between 30 and 36 %. (Table S1). The differences were attributed to the precision of the determination of the *ee* and the variation ( $\pm 20\%$ ) of the sublimed amount. The difference between two *ee* of sublimates for experiments starting from the same *ee* has never been higher than 9 % ( $\pm 5\%$ ).

**Table S1:** *ee* after sublimation under standard procedure of a DL + L mixture of leucine.

| Entry | Starting <i>ee</i> | <i>ee</i> sublimate |
|-------|--------------------|---------------------|
| 1     | 9                  | 36                  |
| 2     | 9                  | 30                  |
| 3     | 9                  | 34                  |
| 4     | 9                  | 34                  |
| 5     | 9                  | 30                  |

**Table S2:** Starting *ee* and *ee* of the sublimate of DL and L mixtures of leucine.<sup>a</sup>

| Entry | Starting <i>ee</i> (%) | <i>ee</i> sublimate (%) |
|-------|------------------------|-------------------------|
| 1     | 0                      | 0                       |
| 2     | 5                      | 36                      |
| 3     | 10                     | 42                      |
| 4     | 20                     | 42                      |
| 5     | 30                     | 44                      |
| 6     | 40                     | 48                      |
| 7     | 50                     | 48                      |
| 8     | 60                     | 54                      |
| 9     | 70                     | 52                      |
| 10    | 80                     | 52                      |
| 11    | 90                     | 61                      |
| 12    | 95                     | 65                      |
| 13    | 100                    | 100                     |

<sup>a</sup> The samples were cautiously prepared by grinding appropriate amounts of L- and DL-leucine (1 g) for 10 min in a mortar.

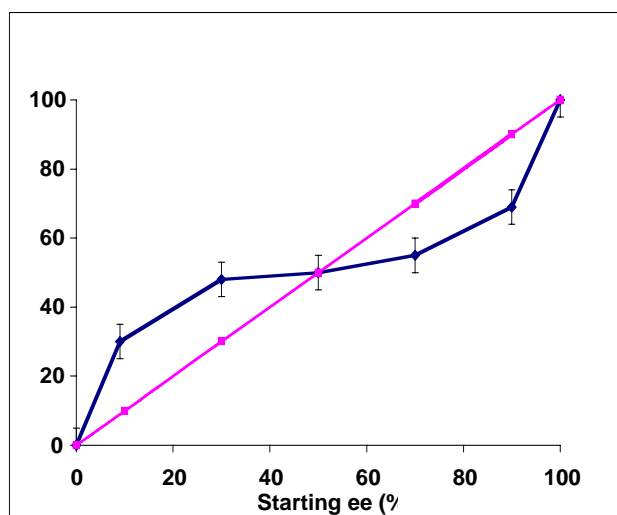

**Fig. S1.** *ee* of the sublimate versus *ee* of the starting material of DL + D leucine.

## Experimental section

*Materials.* Standard sublimation apparatus were purchased from Aldrich. Amino acids were purchased from Aldrich except L-leucine (Alfa-Aesar).

*Sublimation of leucine.* A mixture of 1g of enantiomers (D and L) or racemate and enantiomer (DL and L) or (DL and D) of leucine were cautiously ground in a mortar for about 10 min. The mixture was then cautiously introduced in the sublimation apparatus with a funnel to avoid deposition on the walls. The sublimation apparatus was connected to a vacuum pump and the gas phase was evacuated. The bottom of the apparatus (3 cm) was introduced in an oil bath ( $\theta$ : 120°C). 0.5-1 % (5-10 mg) of the starting material was sublimed after 16 hours at 120 °C under 0.1 mbar. The sublimate was collected from the cold finger by dissolution of the amino acid in aqueous hydrochloric acid (1N). Water was then removed *in vacuo* and the solid was dried *in vacuo* for 30 min at room temperature. Alanine and proline were partially sublimed in similar conditions (16 hours at 120°C).

The amount of starting material (1 g) was only different in experiments using two sublimation apparatus as indicated on Table 3. 5-10 mg of sublimates were obtained for each, independently of the starting amounts.

*Derivatization of an amino acid.* In a 5mL flask were introduced under nitrogen about 10 mg of amino acid (11 mmol, 1eq), 2mL of dry THF, 34  $\mu$ L of pyridine (42 mmol, 3 equiv.) and a large excess of ethyl chloroformate (44  $\mu$ L, 4.4 equiv.). The mixture was stirred for 1h at room temperature. About 50 $\mu$ L of the mixture was then quenched with 1mL of HCl 1N. Ethyl ether (1 mL) was added to extract the derivatized amino acid before to inject it in GC for analysis.

A sample of each starting mixture and each sublimate was derivatized and the *ee* was determined by GC. GC analysis was performed on a CHIRALDEX<sup>TM</sup> G-BP capillary column. The samples of the starting mixtures showed the absence of racemization or enantioenrichment in these conditions.
